# Supplementary material for: Structural CO2 capture preference of semiclathrate hydrate formed with tetra-n-butylammonium chloride
Source: Royal Society of Chemistry journal article supplement (doi:10.1039/d2ce00598k), 2022-01-01
Supplement: d2ce00598k1.pdf [file d2ce00598k1.pdf]

**Supplementary Information for:**

**Structural CO<sub>2</sub> capture preference of semiclathrate hydrate formed with  
tetra-*n*-butylammonium chloride**

Saneshiro Muromachi<sup>a\*</sup>, Satoshi Takeya<sup>b</sup>, Saman Alavi<sup>c</sup>, John A. Ripmeester<sup>c</sup>

<sup>a</sup> Energy Process Research Institute, National Institute of Advanced Industrial Science and Technology (AIST), 16-1 Onogawa, Tsukuba, 305-8569, Japan

<sup>b</sup> National Metrology Institute of Japan (NMIJ), National Institute of Advanced Industrial Science and Technology (AIST), Tsukuba Central 5, 1-1-1 Higashi, Tsukuba, 305-8565, Japan

<sup>c</sup> National Research Council of Canada (NRC), 100 Sussex Dr., Ottawa, ON, K1A0R6, Canada

\* Author to whom correspondence should be addressed. (S. M.)

E-mail: s-muromachi@aist.go.jp

Tell: +81-29-861-4287

Fax: +81-29-861-8706

## 1. Experimental details

**Table S1.** Crystal data and structure refinement results for the present crystal.

|                                                       |                                                         |
|-------------------------------------------------------|---------------------------------------------------------|
| empirical formula                                     | $C_{16.61}H_{102.08}NClO_{33.04}$                       |
| formula weight, $g \cdot mol^{-1}$                    | 884.24                                                  |
| temperature, K                                        | 123 (2)                                                 |
| wavelength, Å                                         | 0.71070                                                 |
| crystal system, space group                           | Tetragonal, $P4_2/m$                                    |
| unit cell dimensions, Å                               | $a = 23.557(3)$<br>$b = 23.557(3)$<br>$c = 12.4259(16)$ |
| volume, Å <sup>3</sup>                                | 6895.4(19)                                              |
| Z, calculated density, $g \cdot cm^{-3}$              | 5, 1.084                                                |
| absorption coefficient $\mu$                          | 0.141                                                   |
| $F(000)$                                              | 2270                                                    |
| crystal size, mm                                      | $0.1 \times 0.1 \times 0.2$                             |
| $\theta$ range for data collection                    | 2.045, 27.682                                           |
| index ranges                                          | $-29 < h < 30$<br>$-15 < k < 30$<br>$-16 < l < 16$      |
| reflections collected/unique                          | 8422/ 5953                                              |
| completeness to $2\theta$                             | 0.999                                                   |
| refinement method                                     | $F^2$ against all reflections                           |
| data/restraints/parameters                            | 8422/ 197/ 691                                          |
| goodness-of-fit on $F^2$                              | 1.030                                                   |
| final $R$ indices [ $I > 2\Sigma(I)$ ] $R_1$ , $wR_2$ | 0.0595, 0.1563                                          |
| $R$ indices (all data) $R_1$ , $wR_2$                 | 0.0877, 0.1746                                          |

## 2. Supplementary information for structure

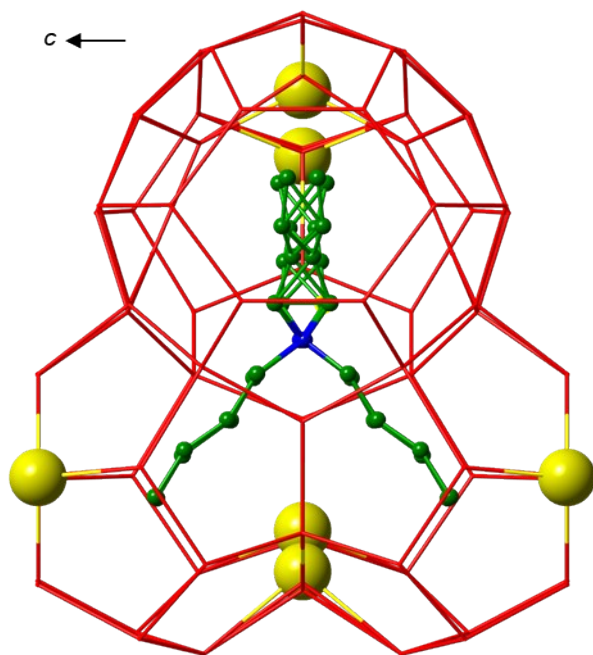

**Fig. S1.** T<sup>3</sup>P cage incorporating TBA cation in the present structure. Coloured spheres: yellow, chlorine; green, carbon of TBA; blue, nitrogen of TBA. Solid red line shows hydrogen bonds between lattice water molecules. Hydrogen atoms are omitted for clarity.

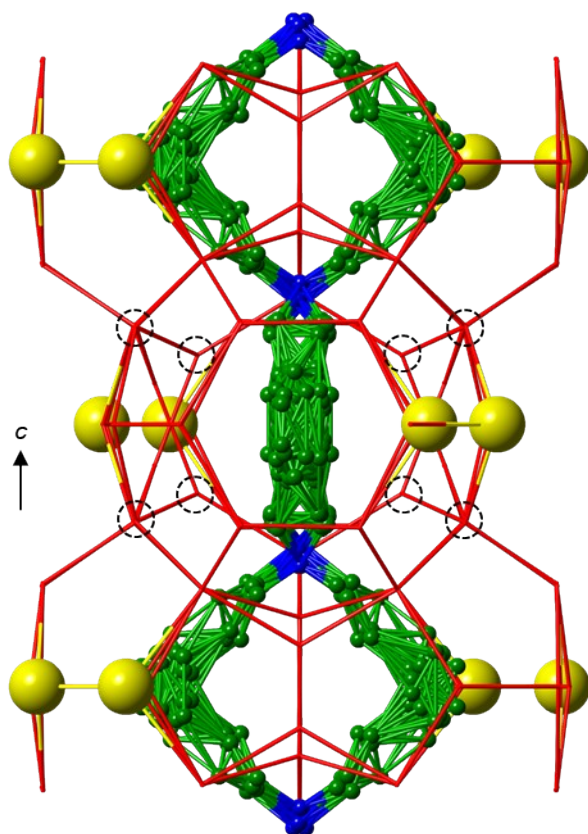

**Fig. S2.** T<sup>4</sup> cage chain incorporating TBA cation in the present structure. Coloured spheres: yellow, chlorine; green, carbon of TBA; blue, nitrogen of TBA. Solid red line shows hydrogen bonds between lattice water molecules. Hydrogen atoms are omitted for clarity. Nitrogen atoms in TBA and lattice water molecules may alternately switch in order to make T<sup>4</sup> cage chain without vacancy. Due to this switching, eight lattice water molecules (indicated by dotted circle) are also switched.

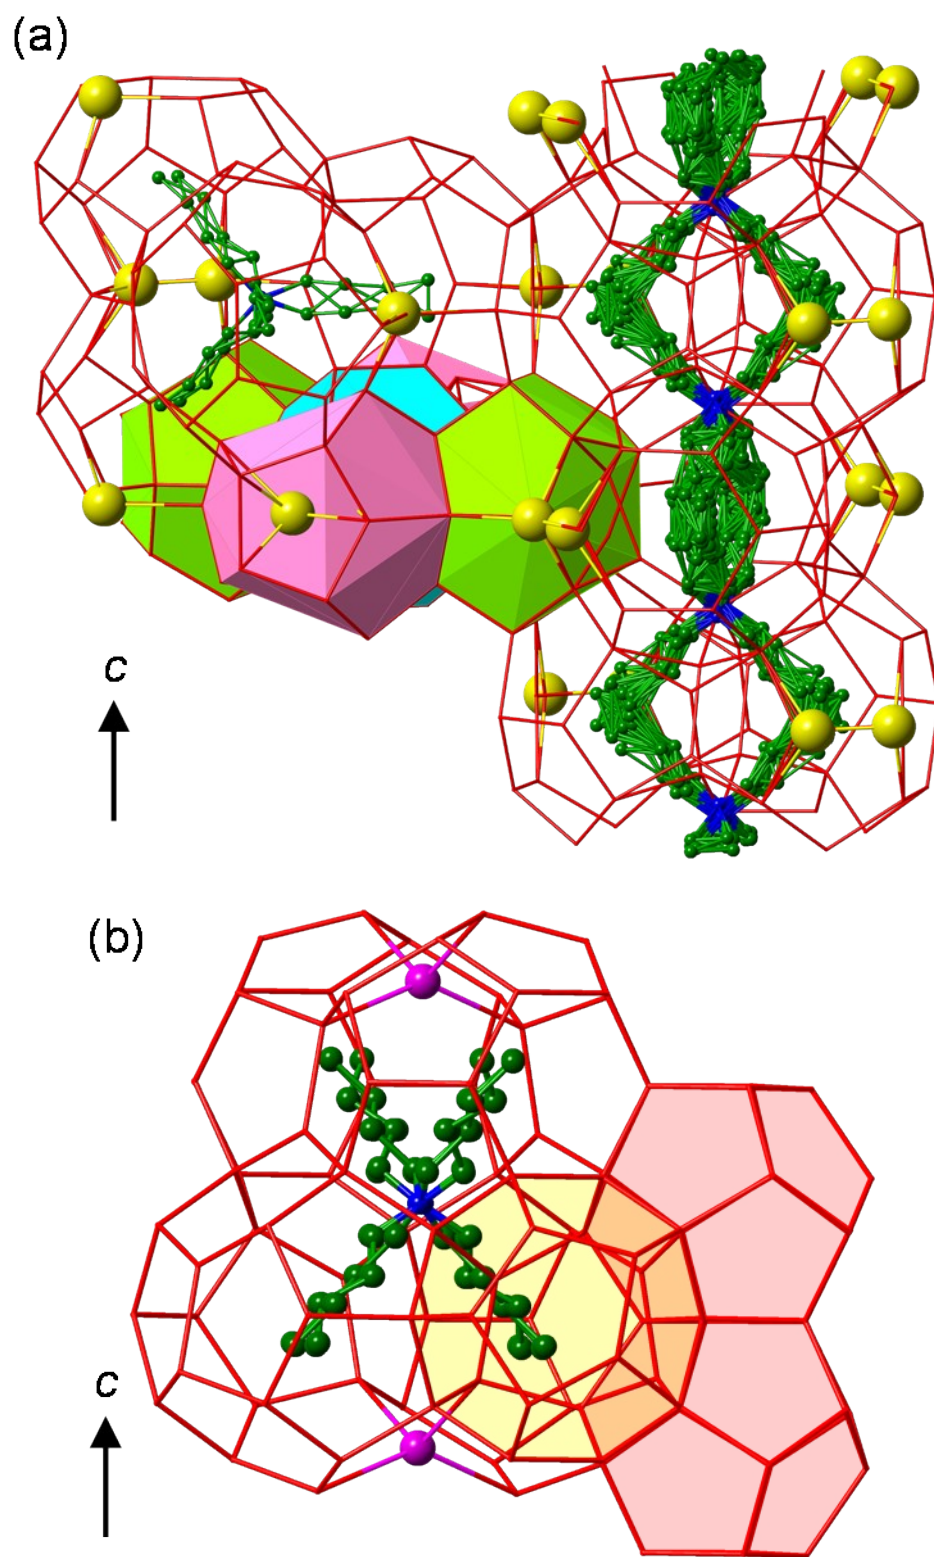

**Fig. S3.** Cage framework for (a) the present TBAC + CO<sub>2</sub> hydrate and (b) TBAB + CO<sub>2</sub> hydrate [10]. Sphere: Magenta, bromide. Coloured polyhedra: magenta, D<sub>L</sub> cage, light green, D<sub>M</sub> cage; light blue, D<sub>N</sub> cage; Yellow, D<sub>A</sub> cage; Red, D<sub>B</sub> cage.

**Table S2.** The shortest distances between chloride anion and nitrogen of TBA cation.

| From                        |   | To   | Distance /Å |
|-----------------------------|---|------|-------------|
| N1 in T <sup>3</sup> P cage | - | Cl3  | 5.1097      |
|                             | - | Cl1  | 5.4341      |
|                             | - | Cl2  | 5.8639      |
|                             | - | ClD2 | 6.8776      |
|                             | - | ClD1 | 7.0397      |
| N2 in T <sup>4</sup> cage   | - | Cl1  | 6.791       |
|                             | - | Cl3  | 7.4891      |
|                             | - | Cl2  | 10.1149     |
|                             | - | ClD1 | 11.2205     |
|                             | - | ClD2 | 13.0971     |
| N22 in T <sup>4</sup> cage  | - | Cl1  | 6.9055      |
|                             | - | Cl3  | 7.534       |
|                             | - | Cl2  | 10.1718     |
|                             | - | ClD1 | 11.3658     |
|                             | - | ClD2 | 13.2389     |
